# Supplementary material for: Polyhydroxylated few layer graphene for the preparation of flexible conductive carbon paper
Source: Royal Society of Chemistry journal article supplement (doi:10.1039/c6ra19078b), 2016-01-01

## SUPPLEMENTARY INFORMATION

### POLYHYDROXYLATED FEW LAYERS GRAPHENE FOR THE PREPARATION OF FLEXIBLE CONDUCTIVE CARBON PAPER

Vincenzina Barbera, Alessandro Porta, Luigi Brambilla, Silvia Guerra, Andrea Serafini, Antonio Marco Valerio, Alessandra Vitale and Maurizio Galimberti

|                                                                                                                                                                                                                                                                                                          |   |
|----------------------------------------------------------------------------------------------------------------------------------------------------------------------------------------------------------------------------------------------------------------------------------------------------------|---|
| Table S.1. Elemental analysis of HSAG and functionalized samples                                                                                                                                                                                                                                         | 2 |
| Table S.2. Mass losses of HSAG and G-OH samples, from TGA analysis                                                                                                                                                                                                                                       | 2 |
| Figure S.1. TGA thermograph of pristine HSAG                                                                                                                                                                                                                                                             | 3 |
| Figure S.2. TGA thermograph of pristine G-OH-M                                                                                                                                                                                                                                                           | 3 |
| Figure S.3 TGA thermograph of pristine G-H-T                                                                                                                                                                                                                                                             | 4 |
| Figure S.4 TGA thermograph of pristine G-OH-TM                                                                                                                                                                                                                                                           | 4 |
| Figure S.5. Proposed two step mechanism for the reaction between HSAG and KOH                                                                                                                                                                                                                            | 5 |
| Figure S.6. Linear relationship between the absorbance at 260 nm and the concentration of water solution of G-OH-TM                                                                                                                                                                                      | 6 |
| Figure S.7. WAXD patterns of G-OH-M (a), paper support (b) and carbon paper obtained by depositing G-OH-M water solutions (1 mg/mL, 100 $\mu$ m bar) (c)                                                                                                                                                 | 7 |
| Figure S.8 CVs of 0.1 M Et <sub>4</sub> NBF <sub>4</sub> /10 mM K <sub>4</sub> Fe(CN) <sub>6</sub> solution (a), 0.125 mM G-OH suspension/0.1 M Et <sub>4</sub> NBF <sub>4</sub> (b) and 0.1 M Et <sub>4</sub> NBF <sub>4</sub> /10 mM K <sub>4</sub> Fe(CN) <sub>6</sub> solution and 0.125 mM G-OH (c) | 8 |

**Table S.1.** Elemental analysis of HSAG and functionalized samples

| <b>Adduct</b> | <b>C</b> | <b>H</b> | <b>O</b> | <b>N</b> | <b>Residue</b> |
|---------------|----------|----------|----------|----------|----------------|
| HSAG          | 95.4     | 0.4      | 4.2      | /        | /              |
| GO            | 48.5     | 2.2      | 36.4     | 0.2      | 13.8           |
| G-OH-M        | 89.1     | 0.6      | 6.1      | 0.2      | 4.9            |
| G-OH-T        | 91.0     | 0.5      | 5.0      | 0.2      | 3.4            |

**Table S.2** Mass losses of HSAG and G-OH samples, from TGA analysis

| <b>Sample</b>  | <b>Mass loss [%]</b> |                                |                     |                |
|----------------|----------------------|--------------------------------|---------------------|----------------|
|                | <b>T &lt; 150°C</b>  | <b>150°C &lt; T &lt; 700°C</b> | <b>T &gt; 700°C</b> | <b>Residue</b> |
| <b>HSAG</b>    | 1.4                  | 1.8                            | 96.8                | /              |
| <b>G-OH-T</b>  | 2.0                  | 2.0                            | 92.5                | 3.6            |
| <b>G-OH-M</b>  | 3.0                  | 2.9                            | 90.2                | 4.1            |
| <b>G-OH-TM</b> | 2.9                  | 2.2                            | 91.0                | 4.0            |

**Figure S.1.** TGA thermograph of pristine HSAG

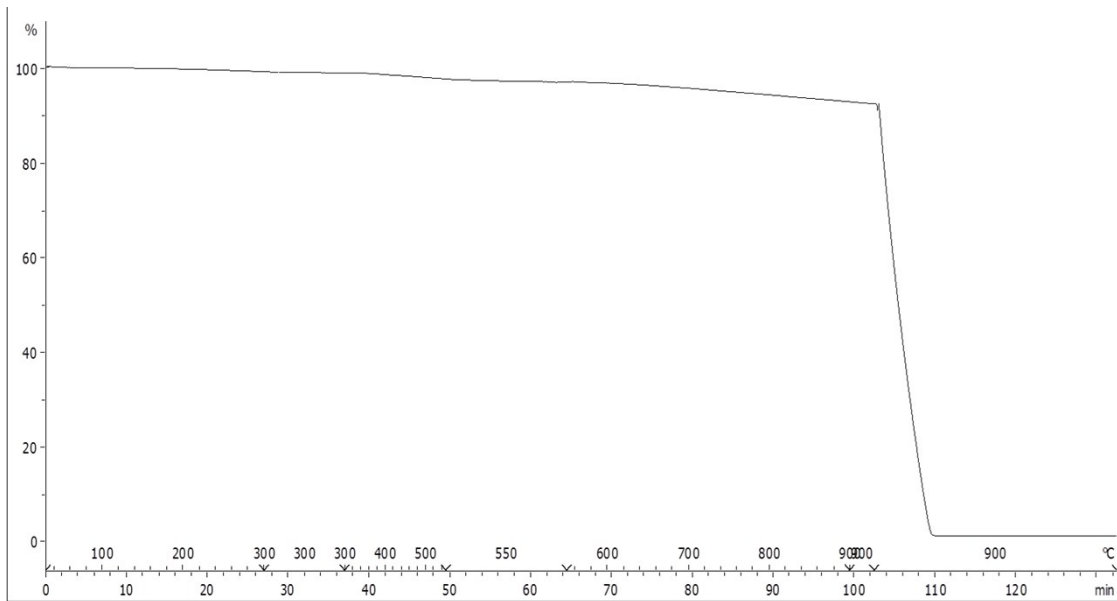

**Figure S.2.** TGA thermograph of pristine G-OH-M

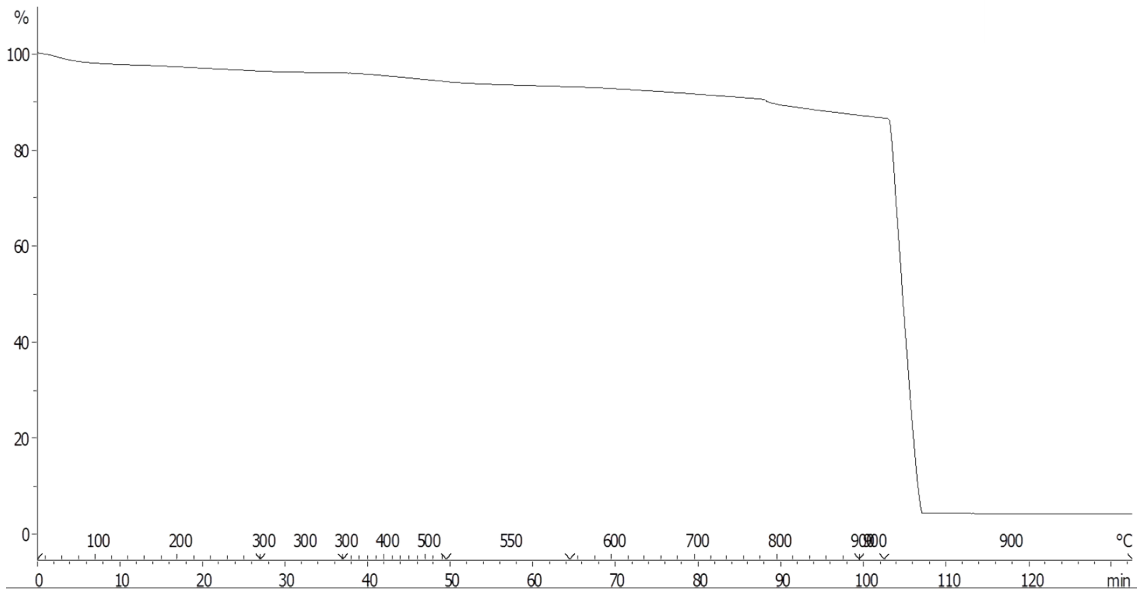

**Figure S.3** TGA thermograph of pristine G-OH-T

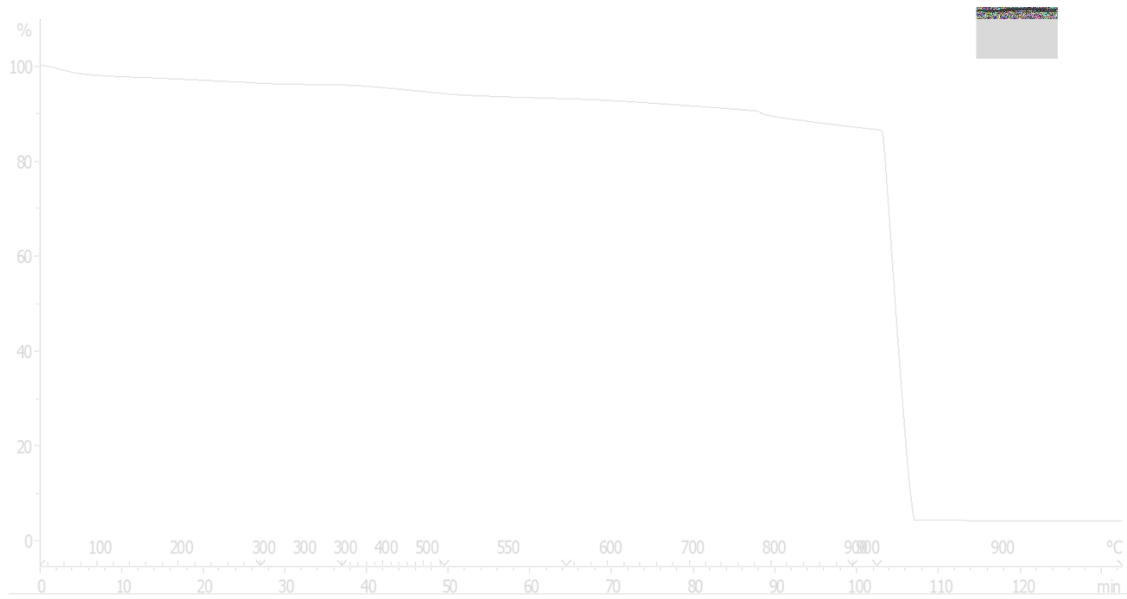

**Figure S.4** TGA thermograph of pristine G-OH-TM

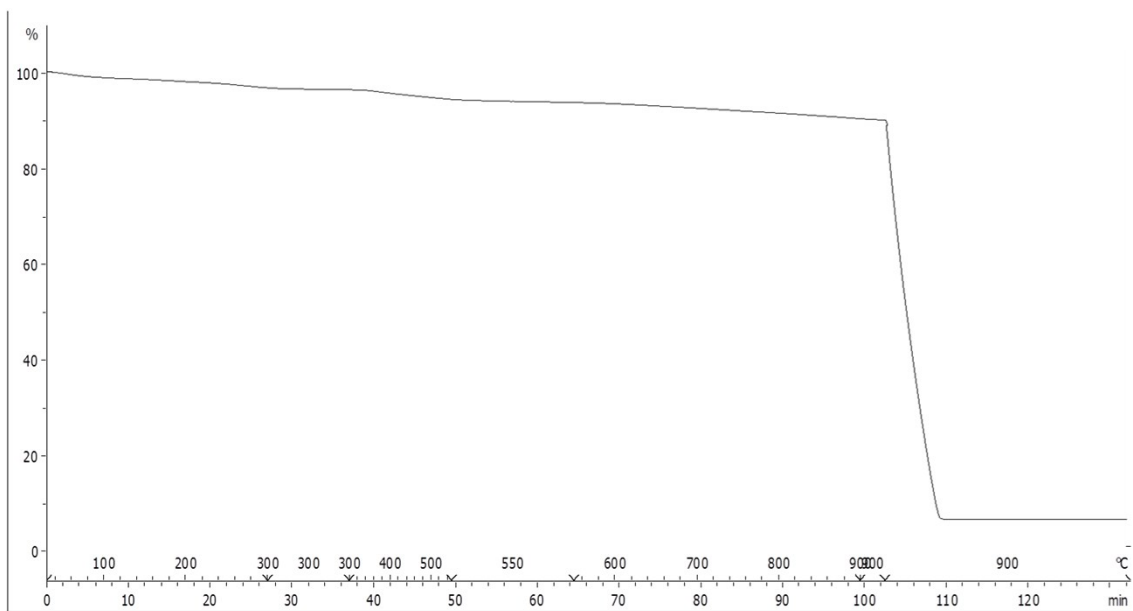

**Figure S.5.** Proposed two step mechanism for the reaction between HSAG and KOH.

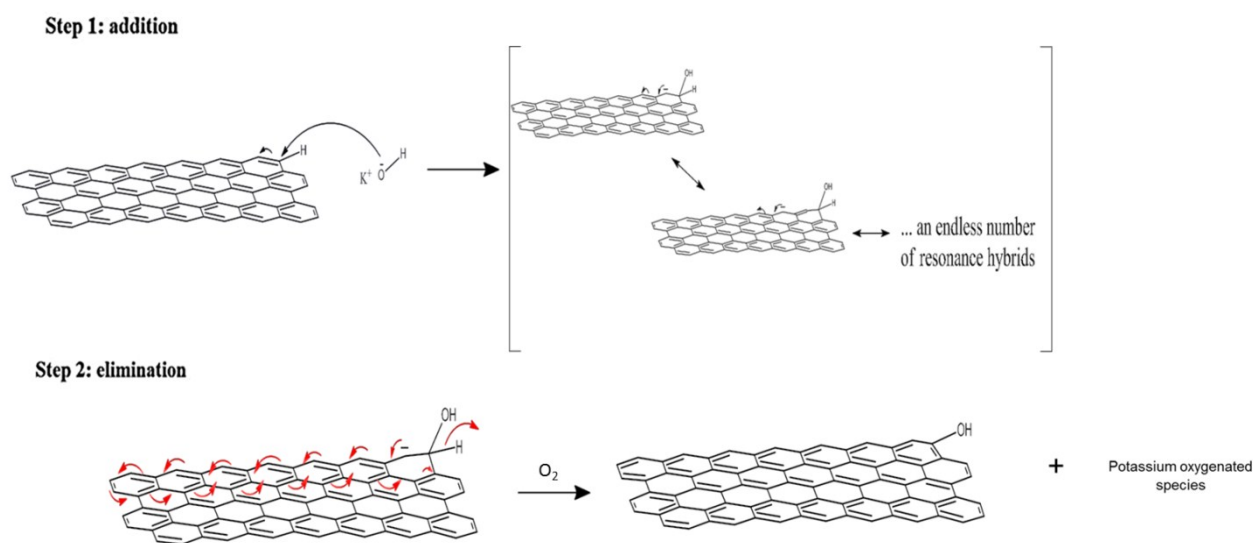

**Figure S.6.** Linear relationship between the absorbance at 260 nm and the concentration of water solution of G-OH-TM

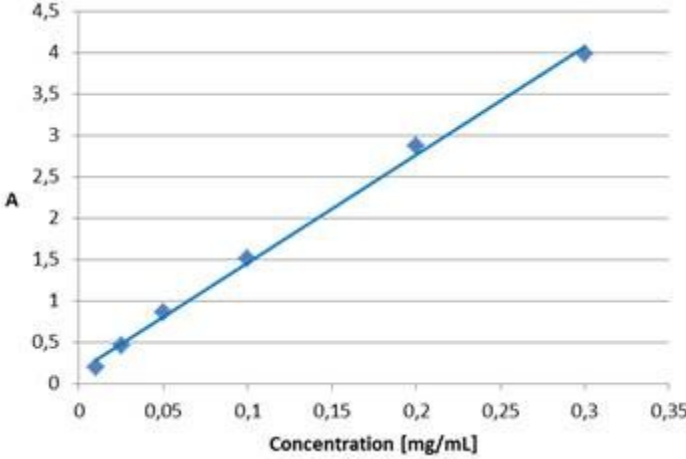

**Figure S.7.** WAXD patterns of G-OH-M (a), paper support (b) and carbon paper obtained by depositing G-OH-M water solutions (1 mg/mL, 100  $\mu\text{m}$  bar) (c)

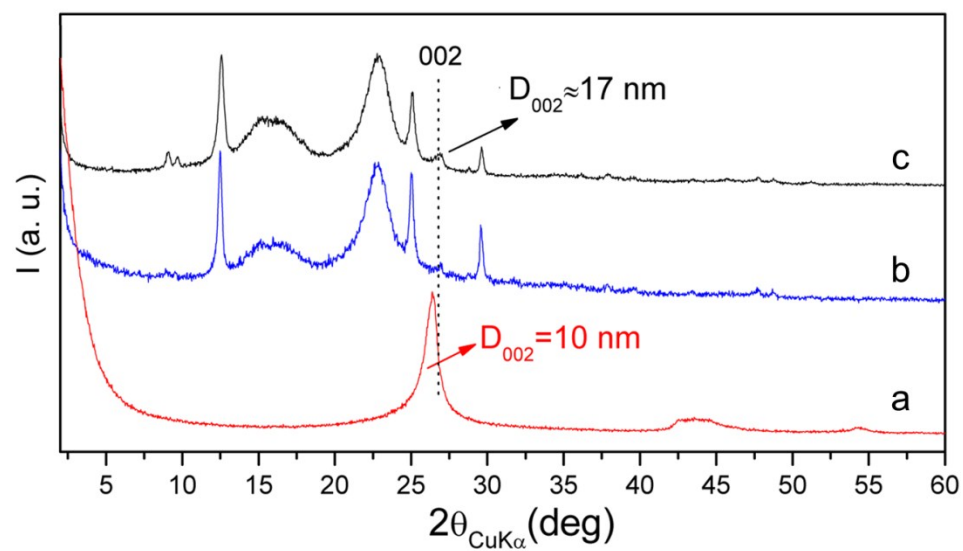

**Figure S.8.** CVs of 0.1 M  $\text{Et}_4\text{NBF}_4/10 \text{ mM K}_4\text{Fe}(\text{CN})_6$  solution (a), 0.125 mM G-OH suspension/0.1 M  $\text{Et}_4\text{NBF}_4$  (b) and 0.1 M  $\text{Et}_4\text{NBF}_4/10 \text{ mM K}_4\text{Fe}(\text{CN})_6$  solution and 0.125 mM G-OH (c)

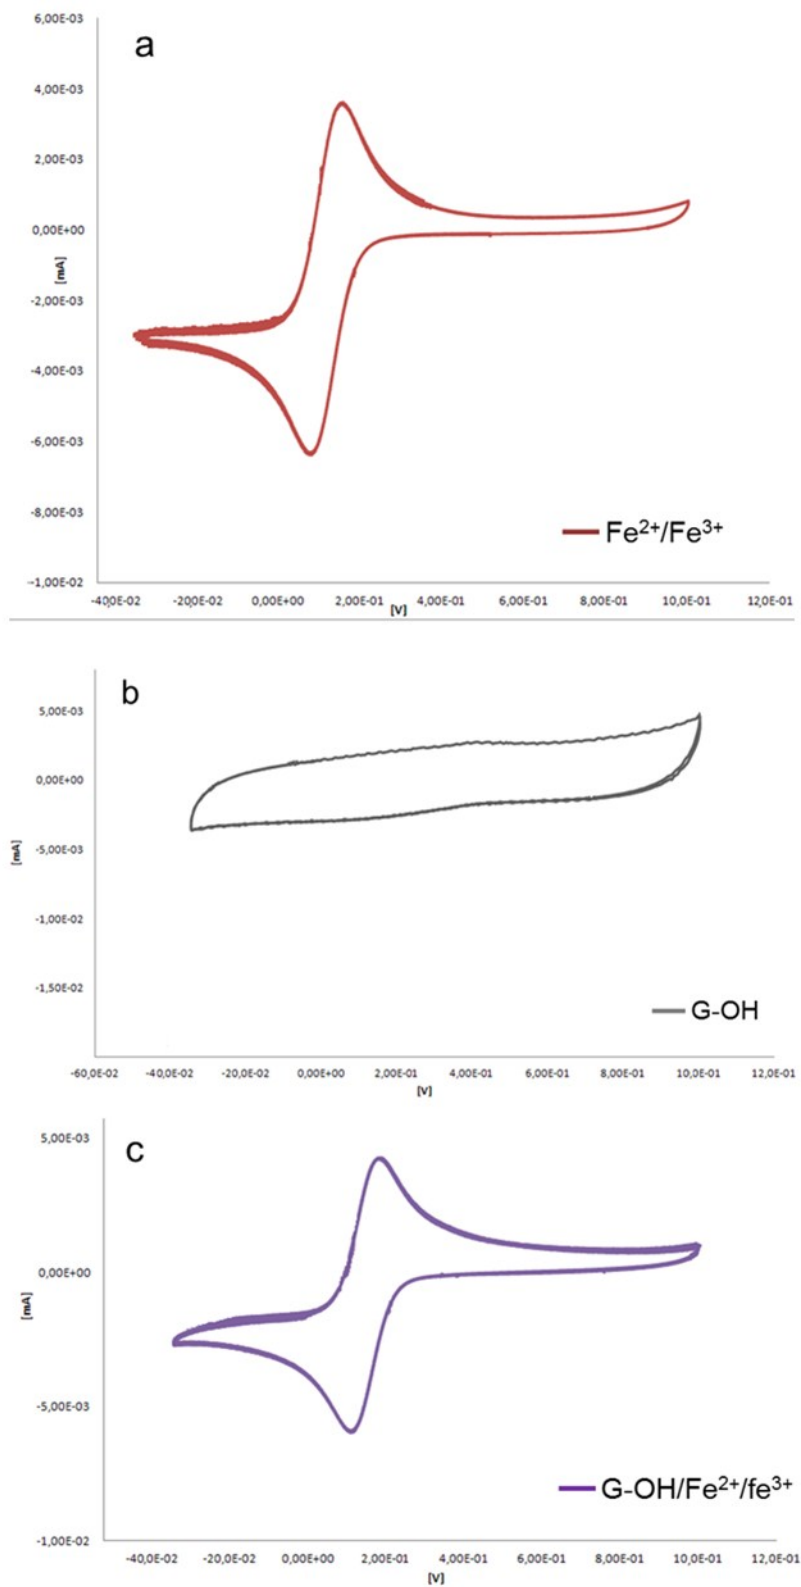

Supplement: c6ra19078b1.pdf [file c6ra19078b1.pdf]
